# Supplementary material for: Asc-1 Transporter (SLC7A10): Homology Models And Molecular Dynamics Insights Into The First Steps Of The Transport Mechanism
Source: Sci Rep. 2020 Feb 28;10:3731. doi: 10.1038/s41598-020-60617-y (PMC7048771; doi:10.1038/s41598-020-60617-y)

# Supplementary Information

## **Asc-1 Transporter (SLC7A10): Homology Models And Molecular Dynamics Insights Into The First Steps Of The Transport Mechanism**

Afaf Mikou<sup>a\*</sup>, Alexandre Cabayé<sup>a,b</sup>, Anne Goupil<sup>b</sup>, Hugues-Olivier Bertrand<sup>b</sup>, Jean-Pierre Mothet<sup>c</sup> & Francine C. Acher<sup>a\*</sup>

<sup>a</sup> Laboratoire de Chimie et Biochimie Pharmacologiques et Toxicologiques, UMR 8601 CNRS, Université de Paris, 45 rue des Saints-Pères, 75270 Paris Cedex 06, France

<sup>b</sup> BIOVIA, Dassault Systèmes, 10 rue Marcel Dassault, CS 40501, 78946 Vélizy-Villacoublay Cedex, France

<sup>c</sup> LuMIn FRE2036, Université Paris-Saclay, CNRS, ENS Paris-Saclay, CentraleSupélec, 91190, Gif-sur-Yvette, France

\* Correspondence and requests for materials should be addressed to A.M. (email: [afaf.mikou@parisdescartes.fr](mailto:afaf.mikou@parisdescartes.fr)) or F.A. (email: [francine.acher@parisdescartes.fr](mailto:francine.acher@parisdescartes.fr))

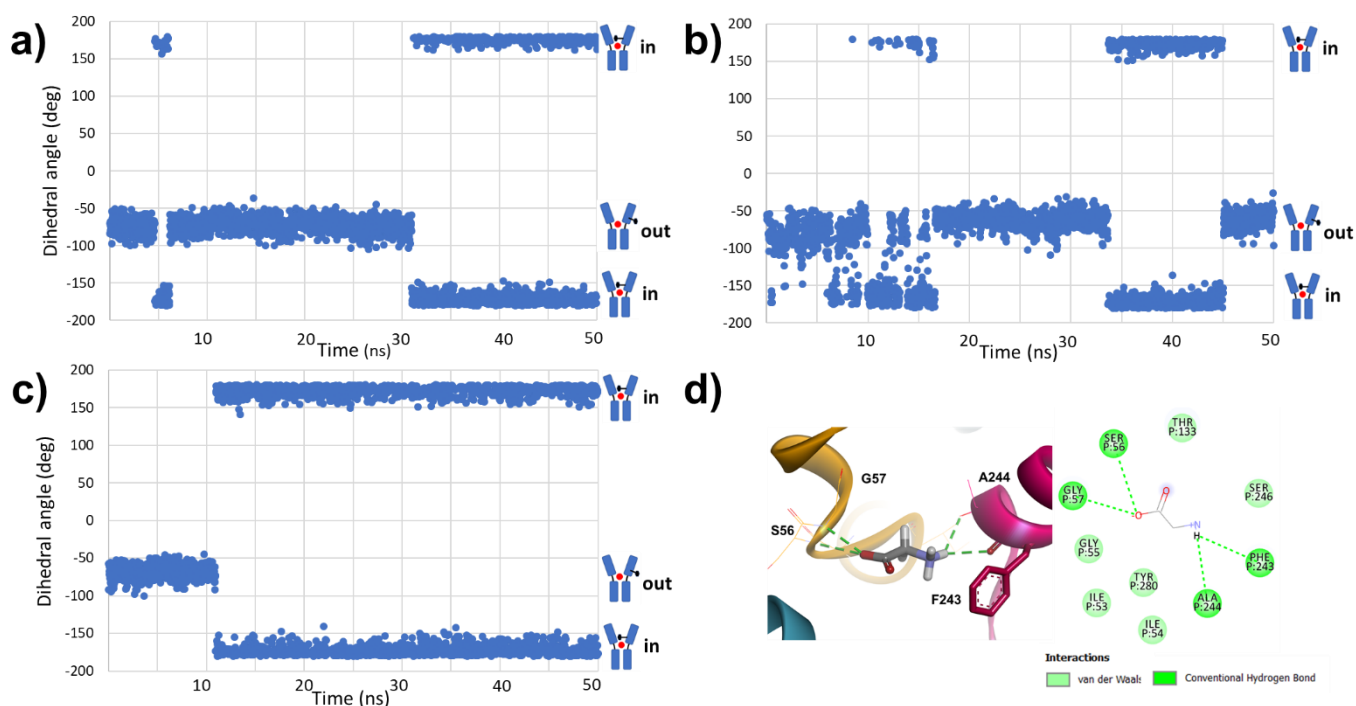

**Figure S1.** Monitoring the movement of Phe243 aromatic ring during molecular dynamic (MD) simulations of the complex Asc-1 in the OO conformation docked with three substrates: **a)** in the case of L-alanine, **b)** in the case of L-serine, **c)** in the case of glycine. The monitoring was based on the Phe243 dihedral angle N-C $\alpha$ -C $\beta$ -C $\gamma$  during the 50 ns MD simulations which were run several times for each substrate. The flip of Phe243 was observed once for L-Ala, once for L-Ser out of 3 MDs, twice for Gly out of 5 MDs. A cartoon of the two “in” and “out” Asc-1 states describes the positions of Phe243 as in Figure 7a. **d)** A snapshot of MD simulation showing the flip of Phe243 and the interactions between the glycine substrate and the Asc-1 TM1 and TM6. A 2D diagram of these interactions is displayed in the right panel.

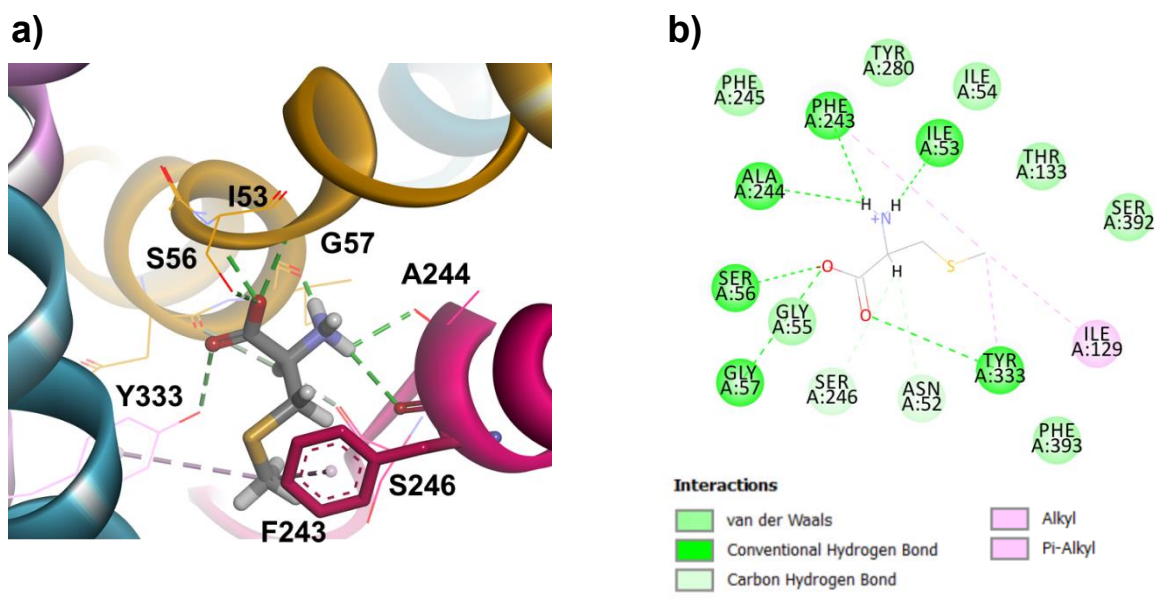

**Figure S2.** Homology model of Asc-1 in the outward-open occluded conformation docked with SMLC. TM1, TM6 and TM8 are colored in yellow, raspberry pink and light pink respectively. **a).** Zoom on the top view of the OOO conformation after SLMC docking. Multiple key interactions are observed between the residues of both TM1 and TM6 and the amino acid moiety of SMLC. Pi-alkyl interactions are observed between TM6 (F243) and TM8 (Y333) and SMLC side chain. **b)** A 2D diagram showing the interactions between the Asc-1 OOO model and SMLC.

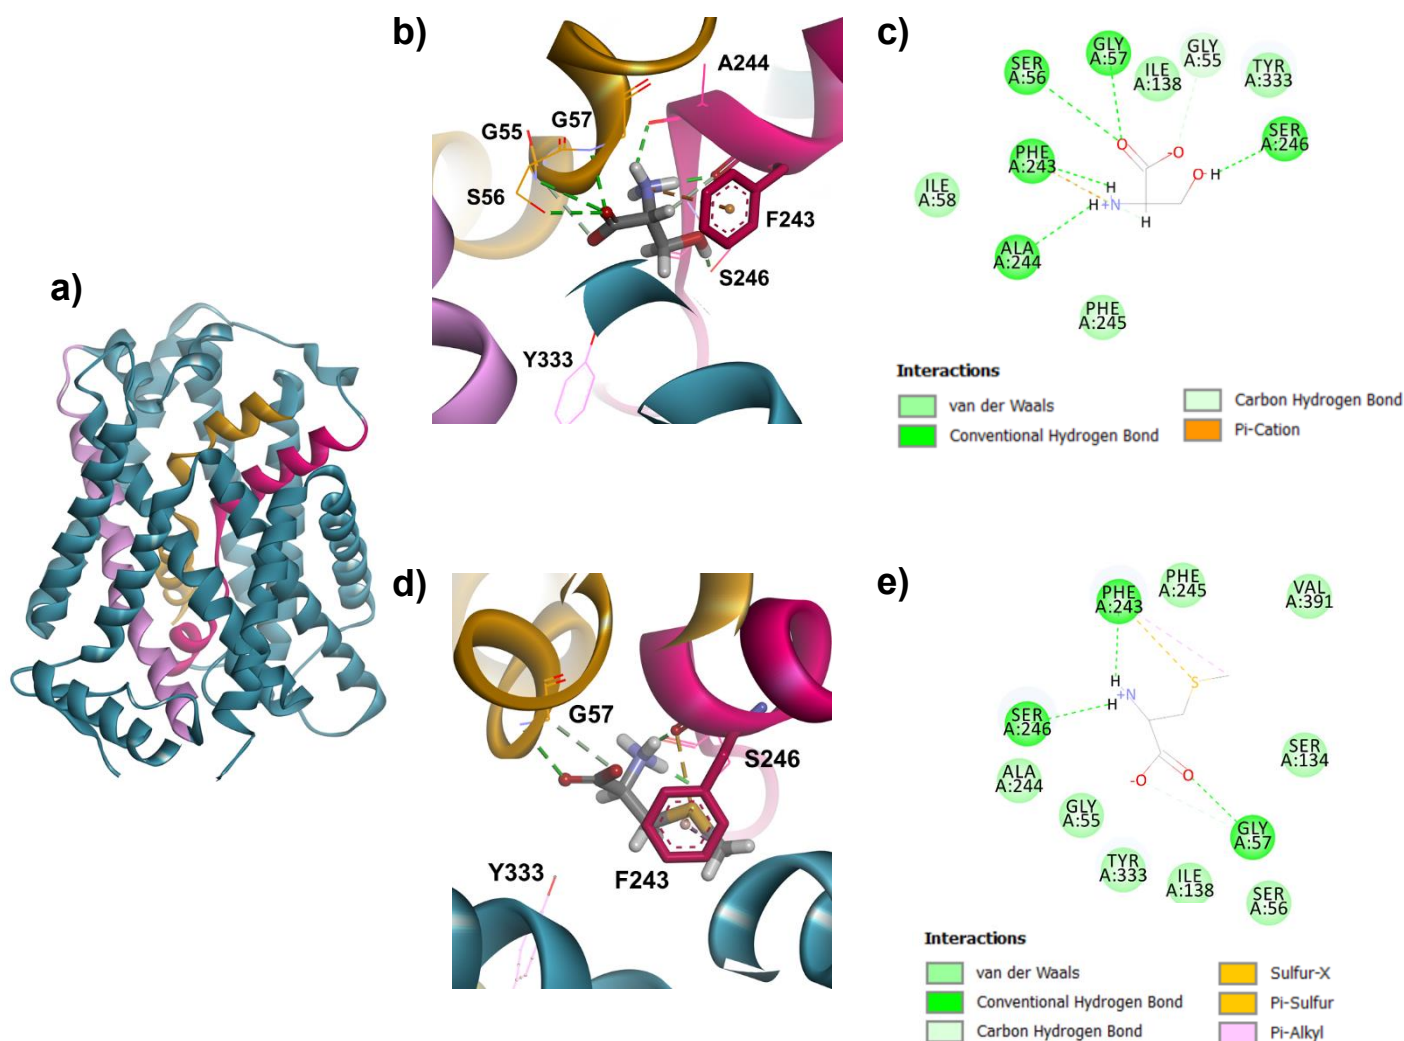

Supplement: Supplementary file 1 — Supplementary Information. [file 41598_2020_60617_MOESM1_ESM.pdf]
